# Supplementary material
Source: ML conference proceedings conference paper supplement (https://openreview.net/forum?id=LssGwibmIr)

CT image

Ground Truth

Baseline

Label filling

Proposed

Case #FLARETs\_0067 (slice #75)

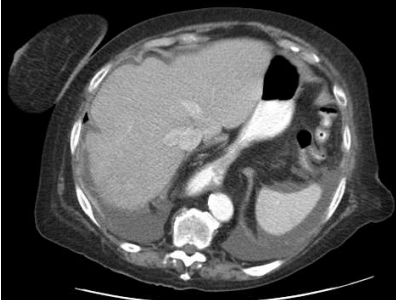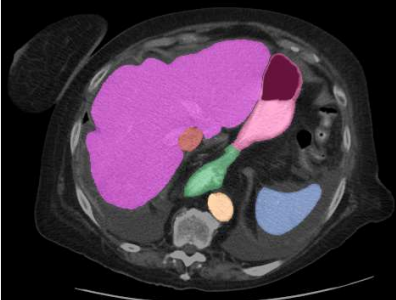

Organ DSC: 0.36 Tumor DSC: 0.66

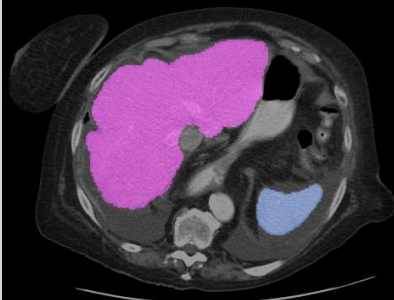

Organ DSC: 0.83 Tumor DSC: 0.50

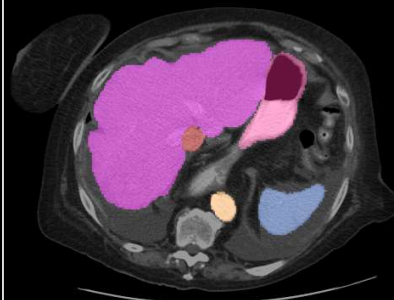

Organ DSC: 0.83 Tumor DSC: 0.40

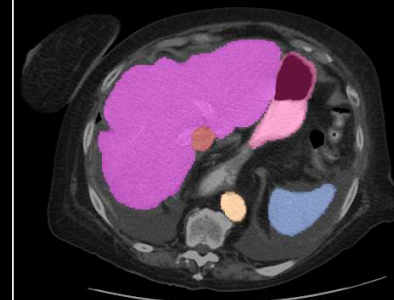

Case #FLARETs\_0095 (slice #66)

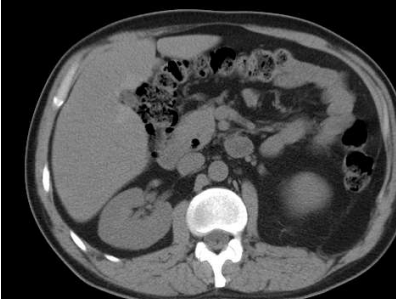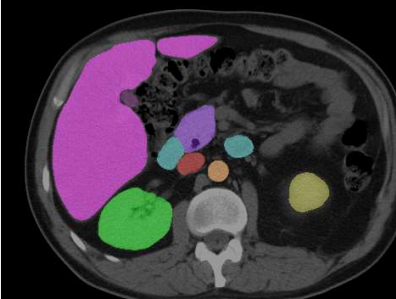

Organ DSC: 0.36 Tumor DSC: 0.76

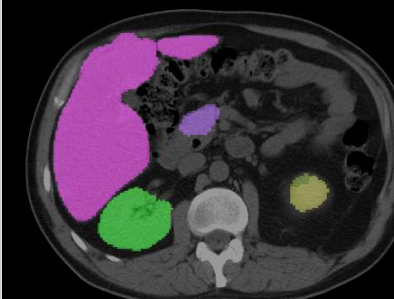

Organ DSC: 0.88 Tumor DSC: 0.59

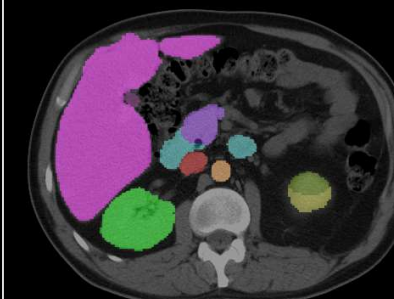

Organ DSC: 0.88 Tumor DSC: 0.44

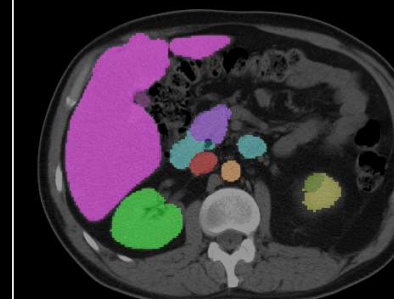

Supplement: supplementary_material [file attachment]
