# Supplementary material
Source: ML conference proceedings conference paper supplement (https://openreview.net/forum?id=LssGwibmIr)

CT image

Ground Truth

Baseline

Label filling

Proposed

Case #FLARETs\_0007 (slice #51)

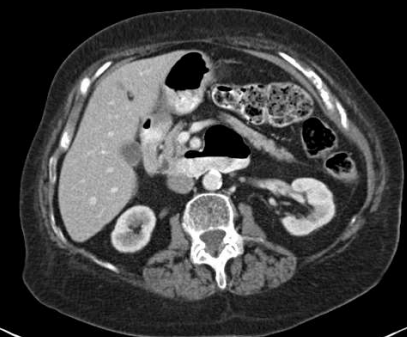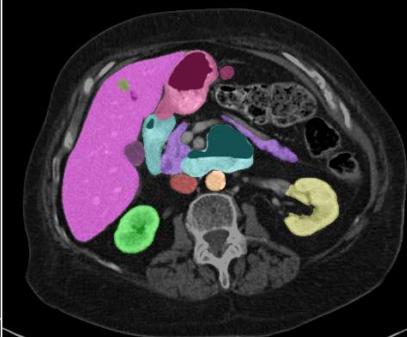

Organ DSC: 0.27 Tumor DSC: 0.0

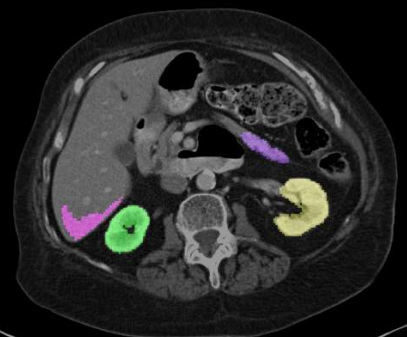

Organ DSC: 0.87 Tumor DSC: 0.86

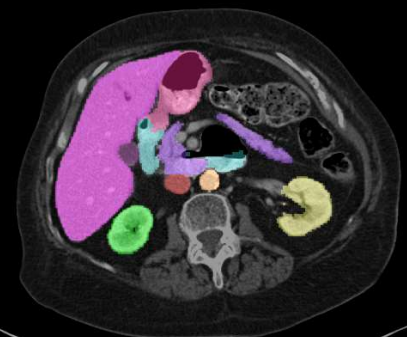

Organ DSC: 0.87 Tumor DSC: 0.87

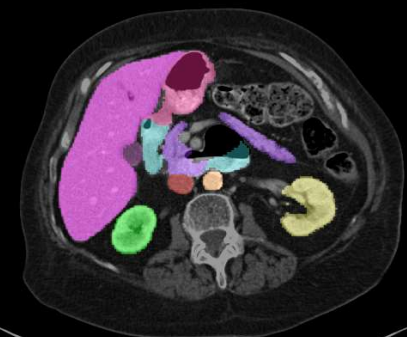

Case #FLARETs\_0023 (slice #83)

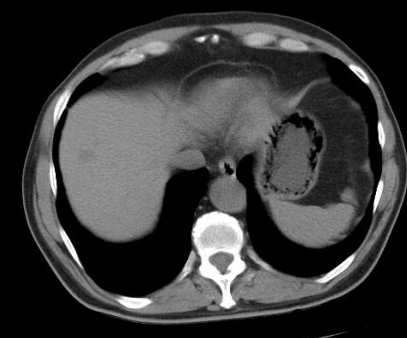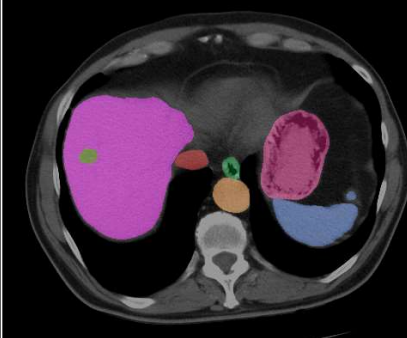

Organ DSC: 0.35 Tumor DSC: 0.0

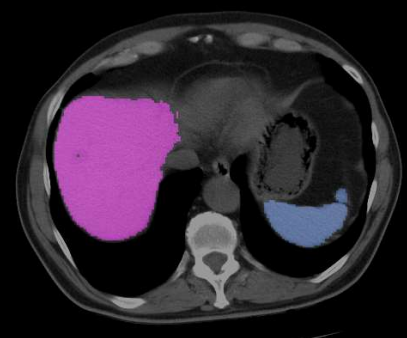

Organ DSC: 0.90 Tumor DSC: 0.29

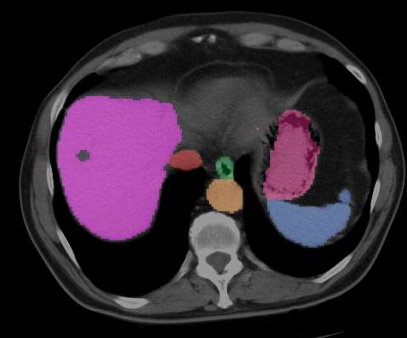

Organ DSC: 0.89 Tumor DSC: 0.14

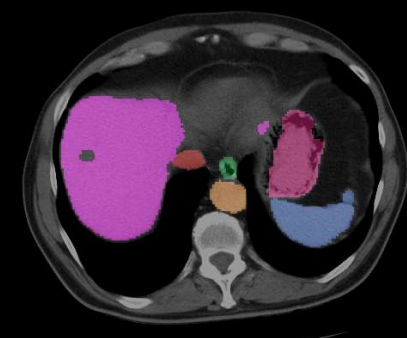

Supplement: supplementary_material [file attachment]
