# Supplementary material
Source: ML conference proceedings conference paper supplement (https://openreview.net/forum?id=LssGwibmIr)

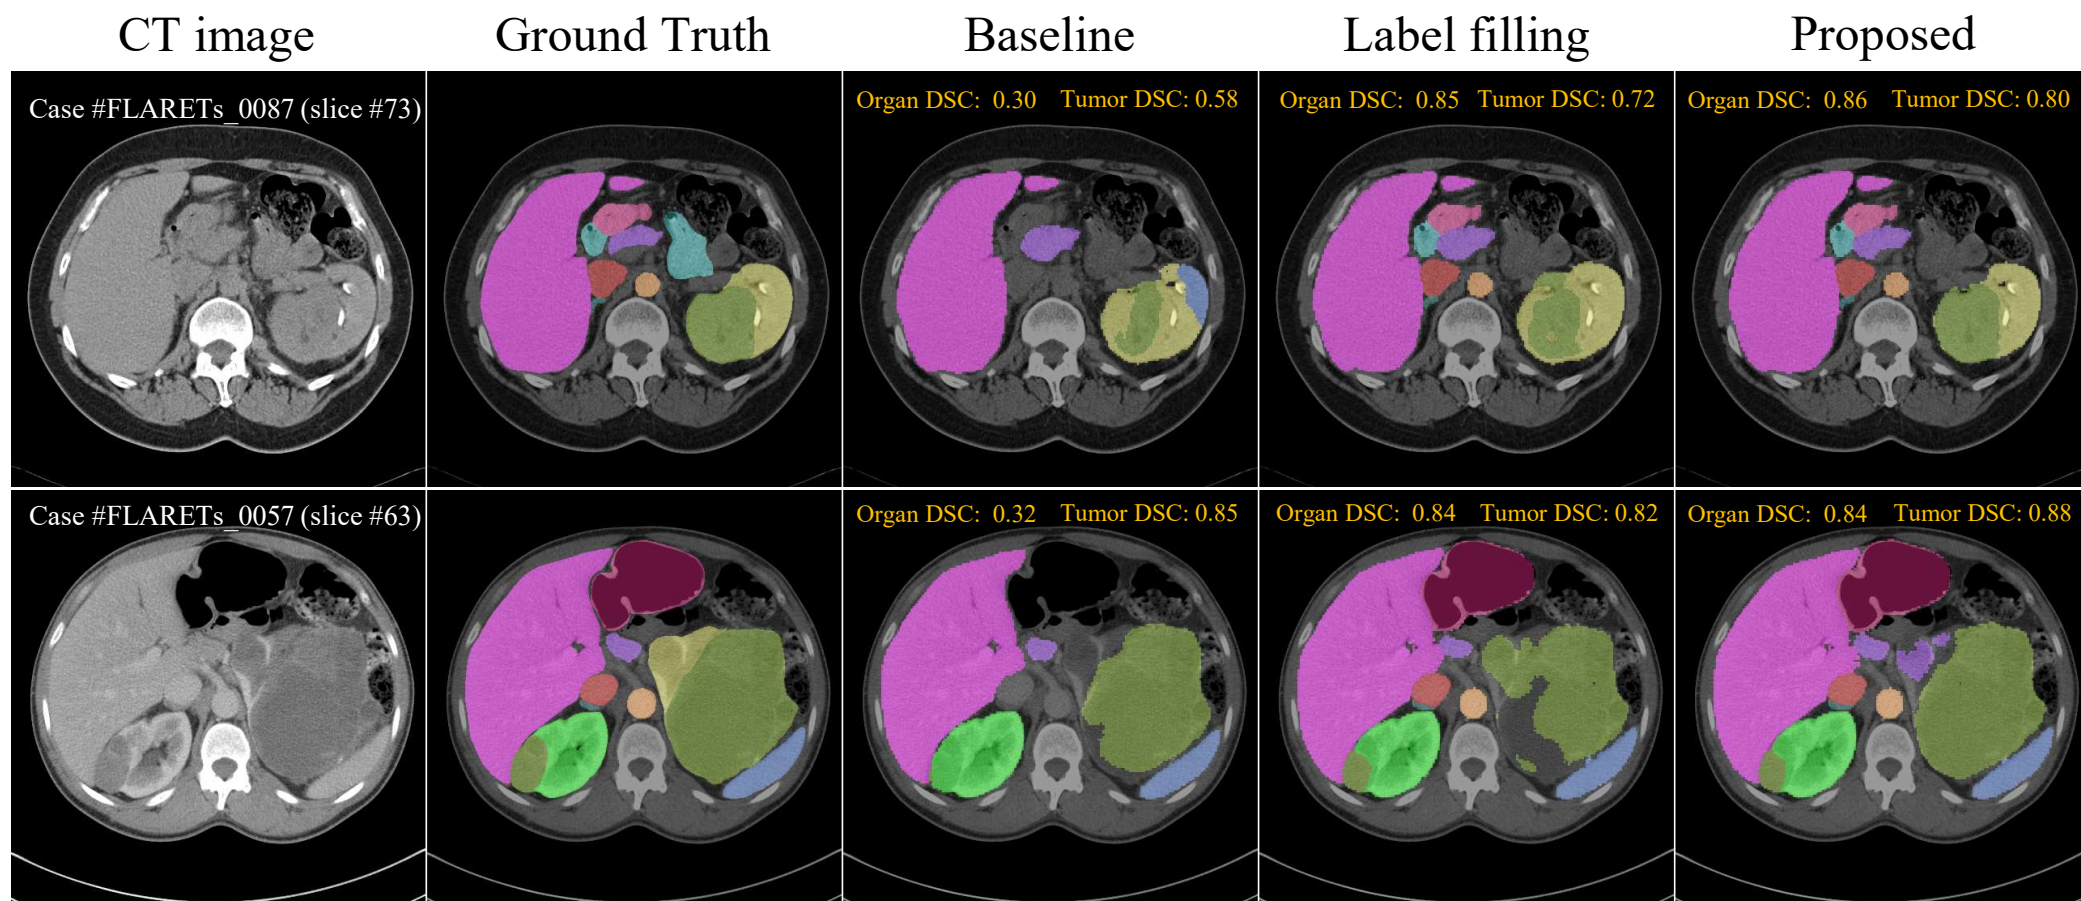

Supplement: supplementary_material [file attachment]

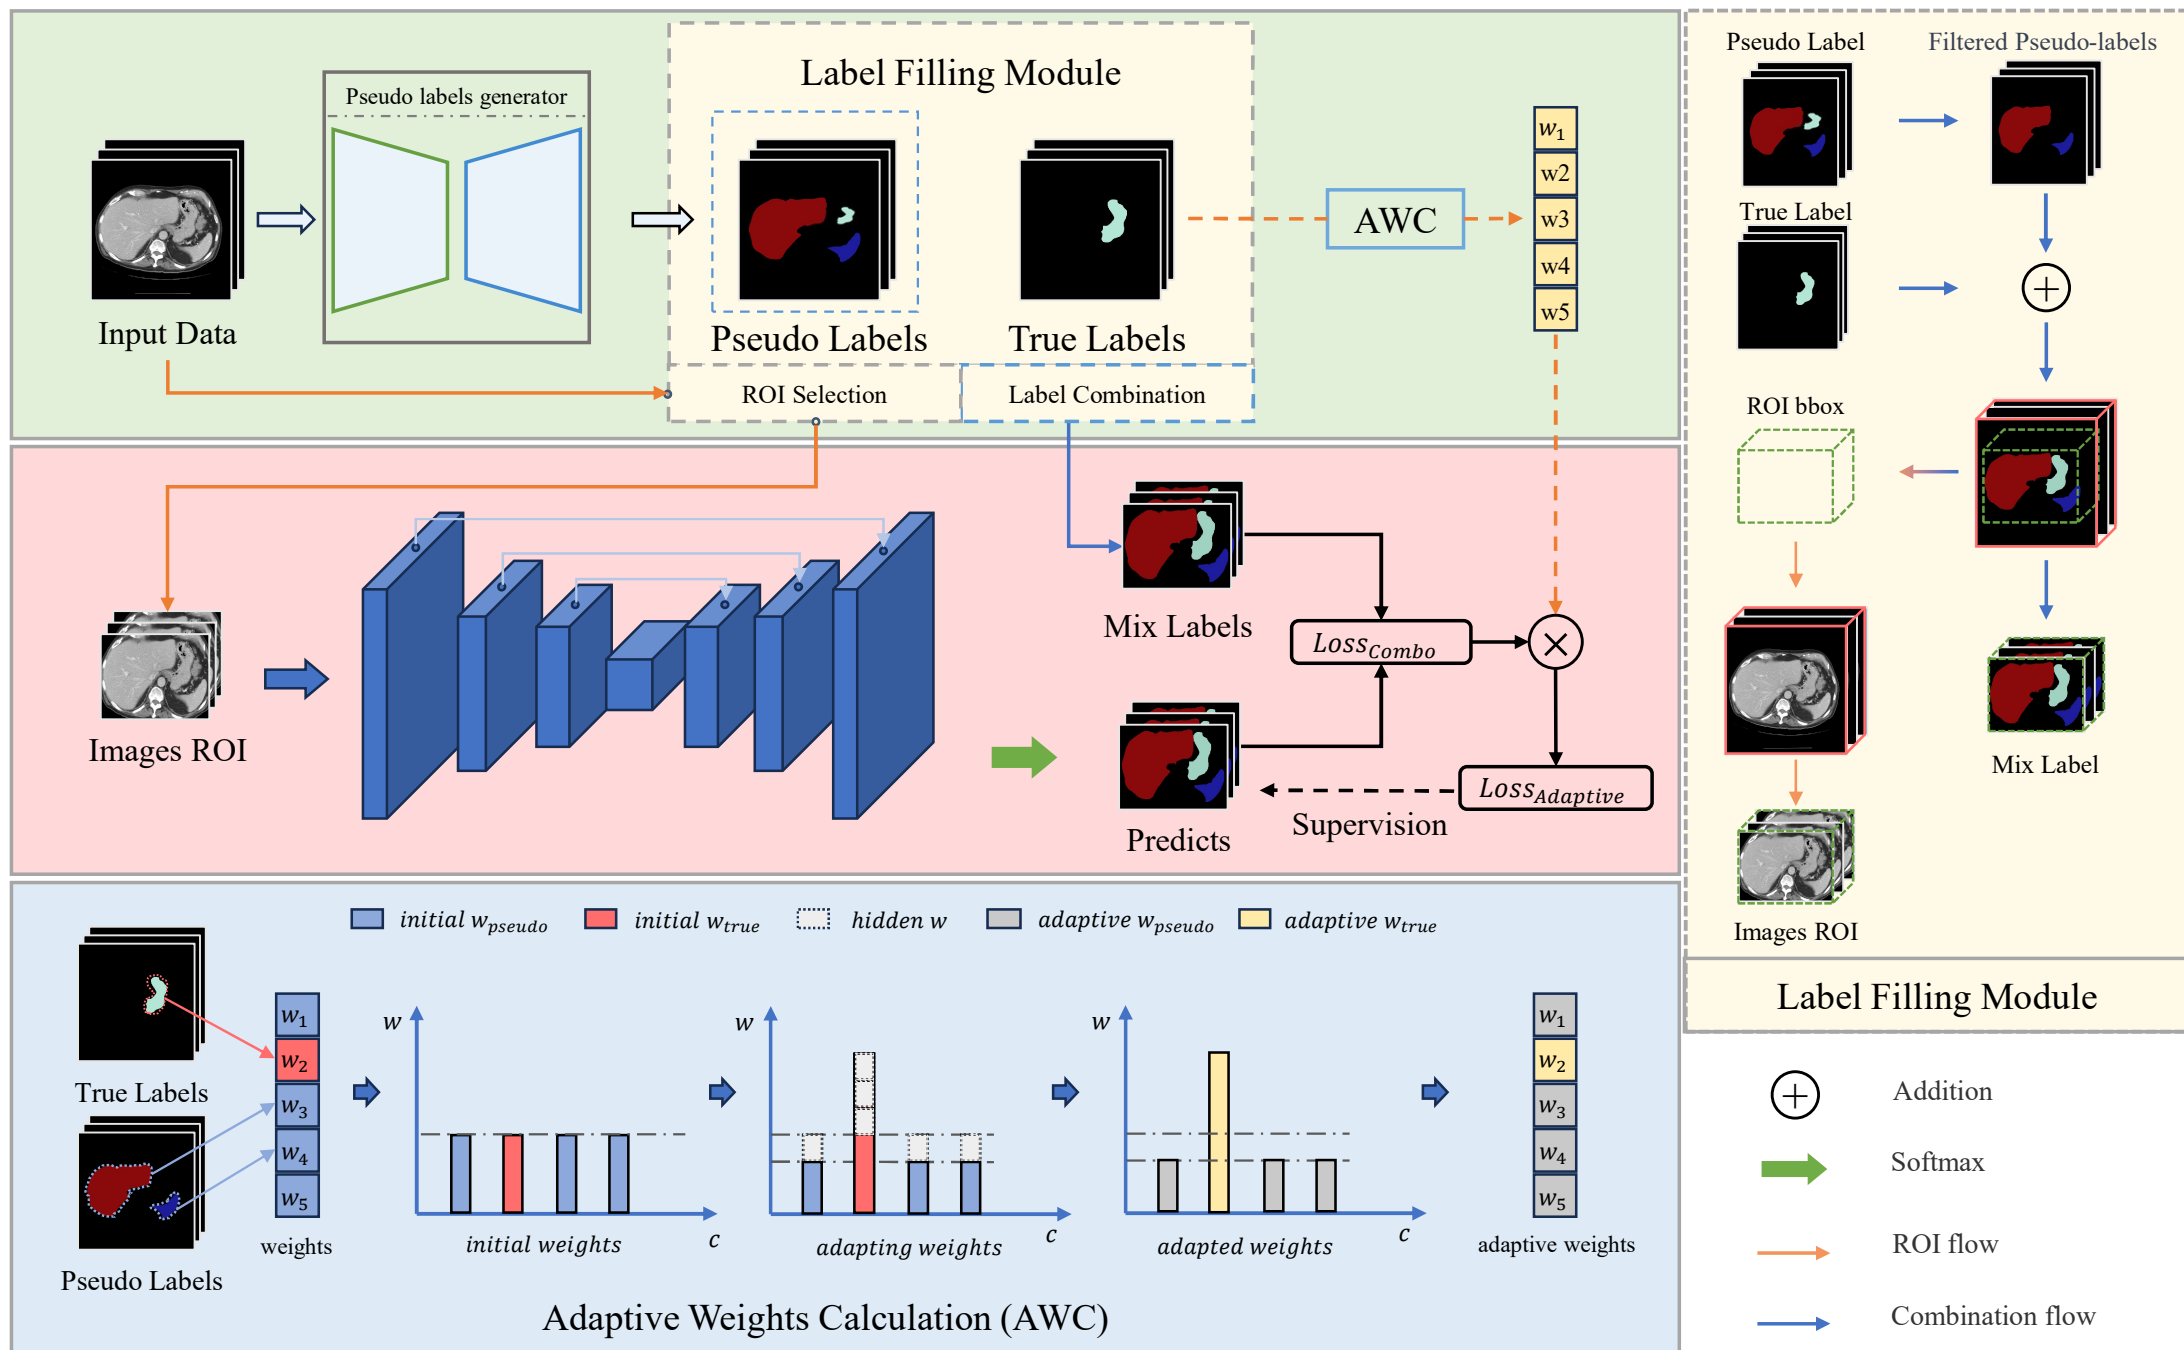

Supplement: supplementary_material [file attachment]

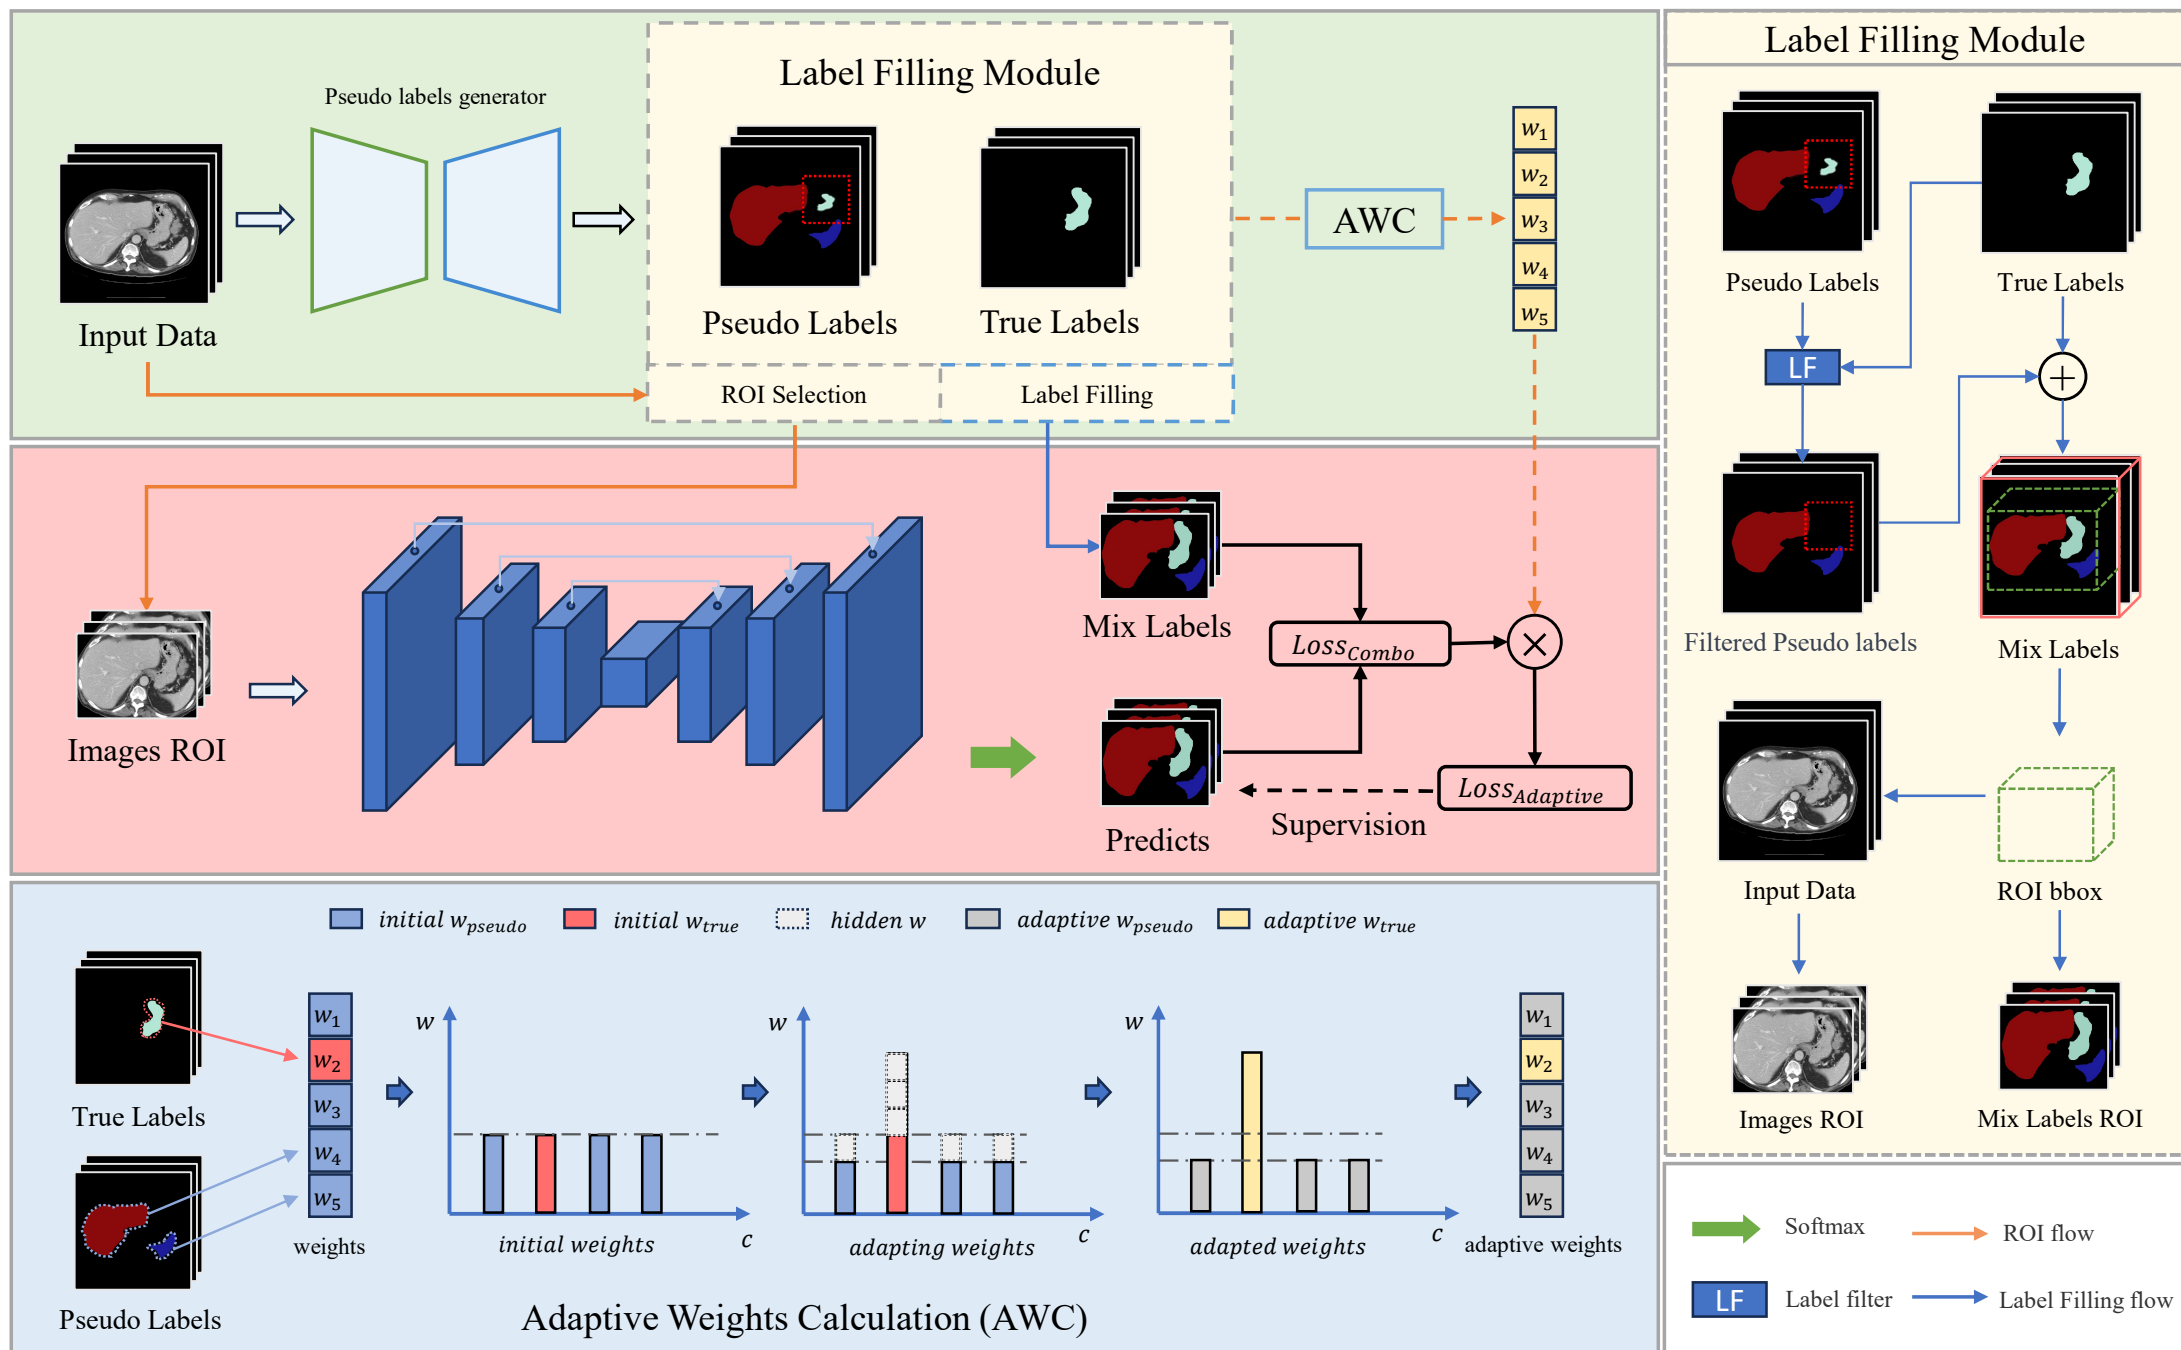

Supplement: supplementary_material [file attachment]

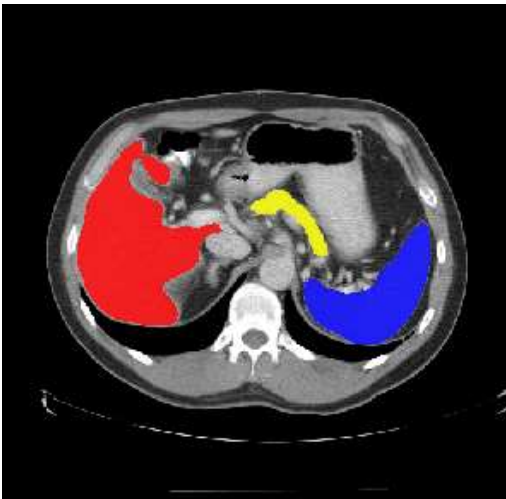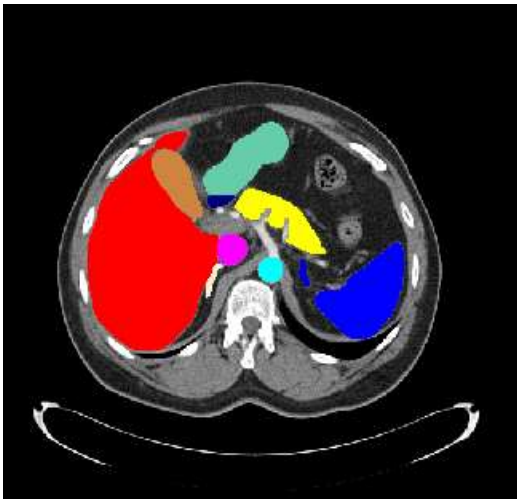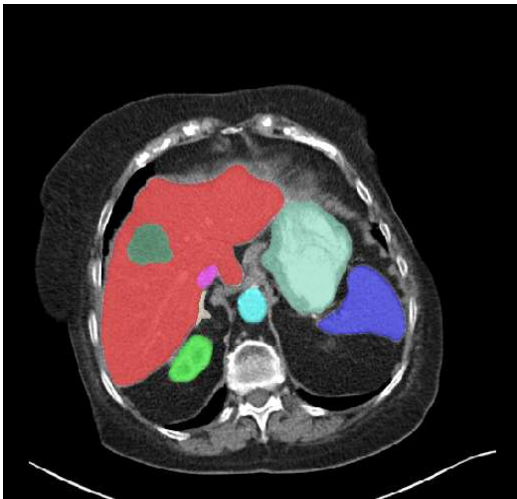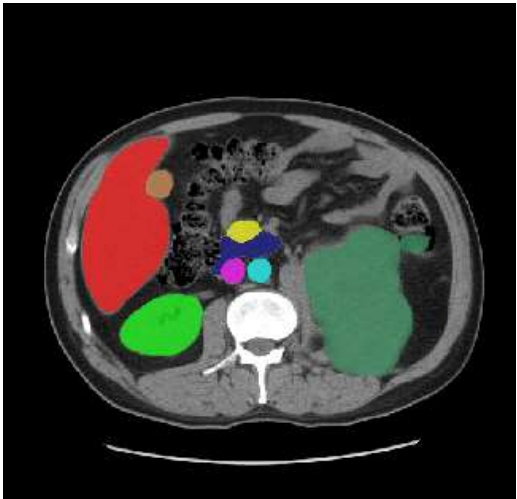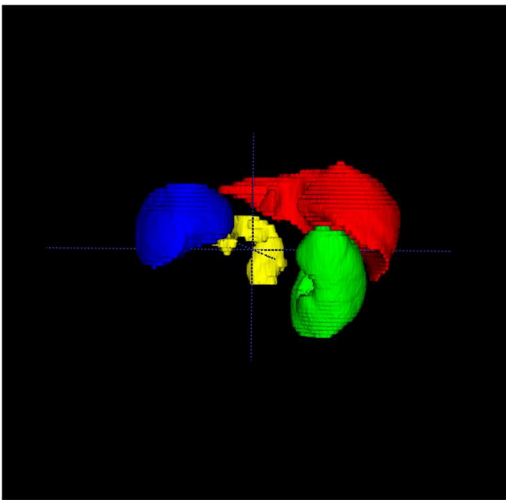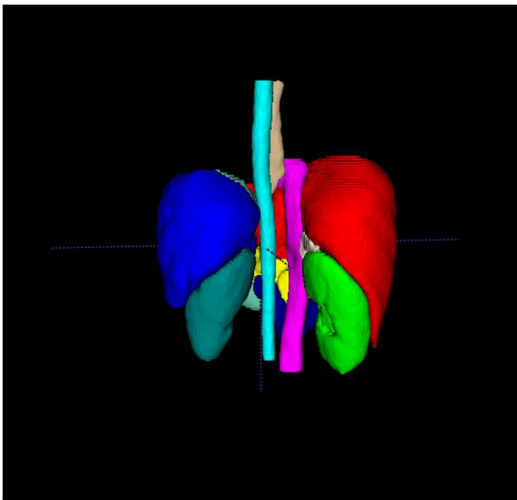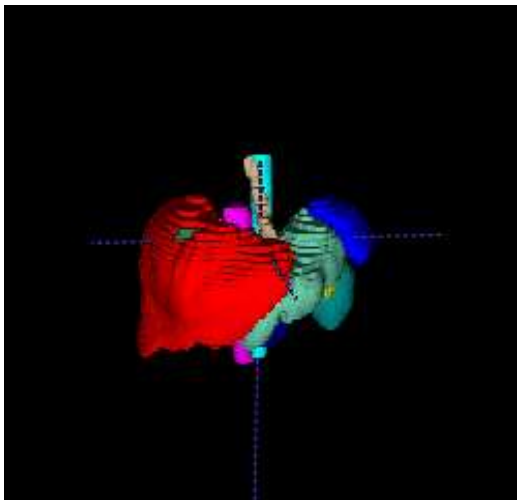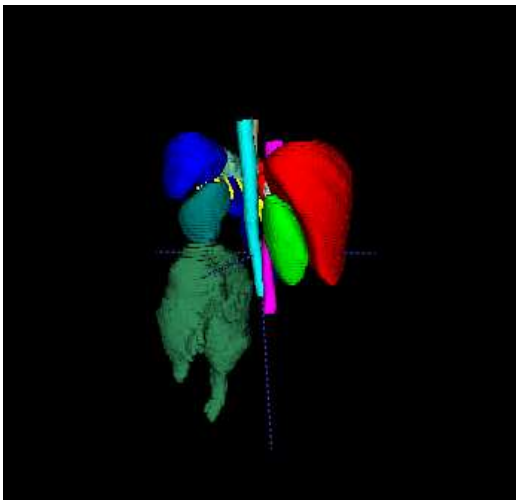

(a) partial organ

(b) full organ

(c) liver tumor

(d) kidney tumor

Supplement: supplementary_material [file attachment]

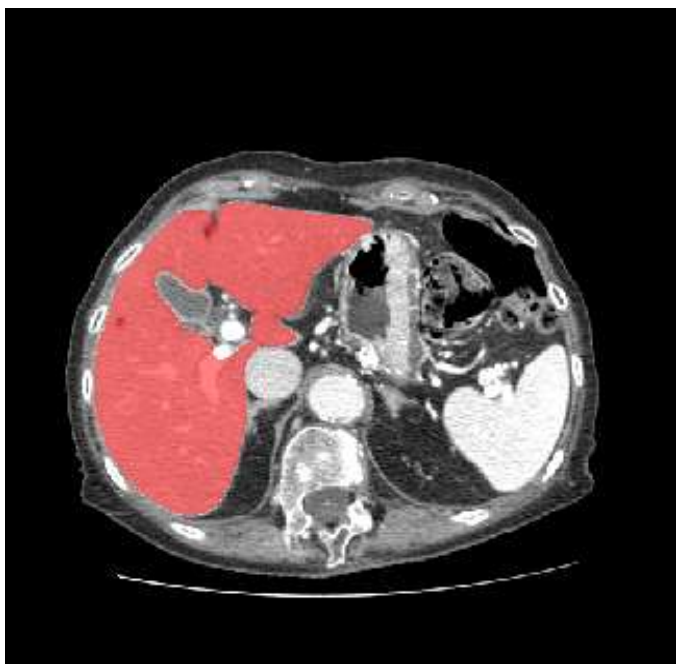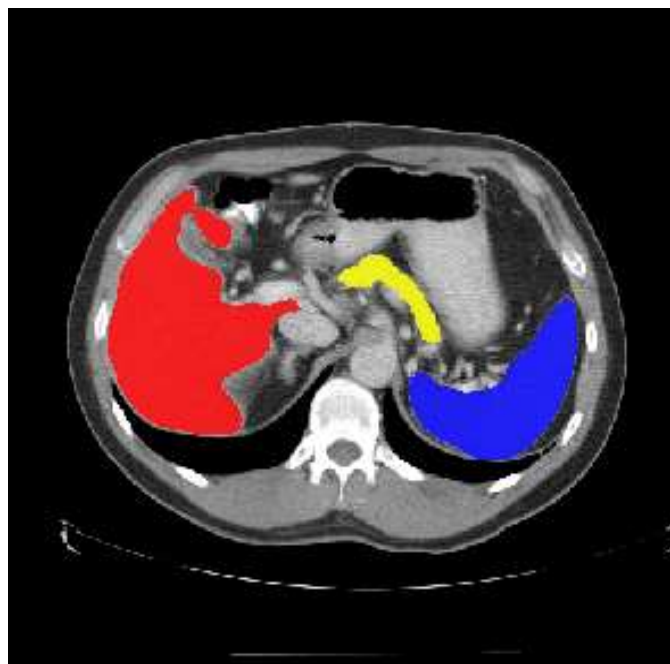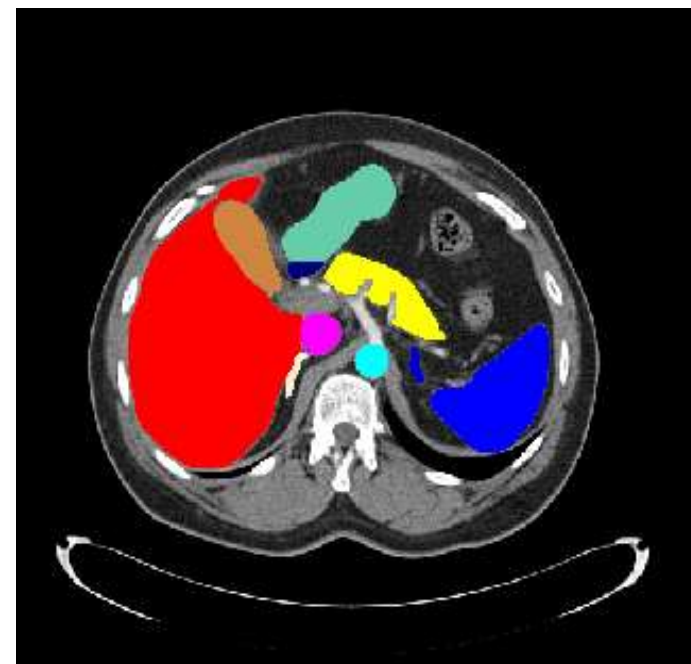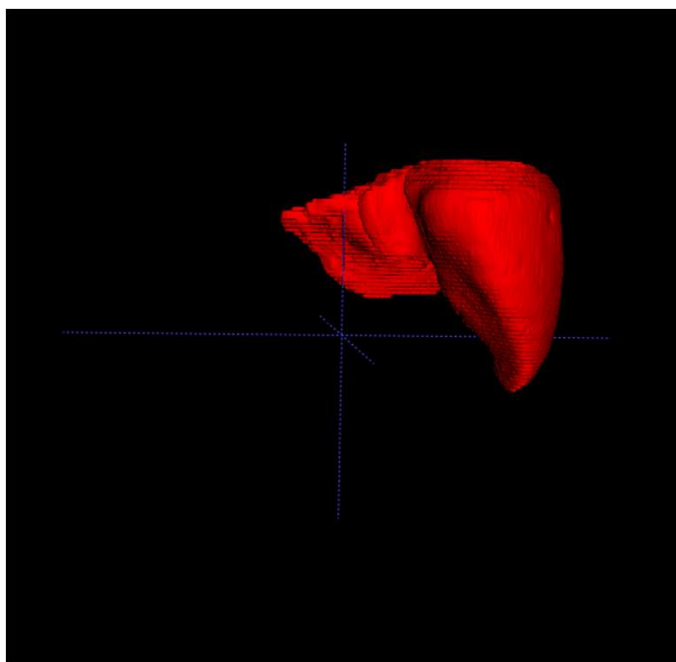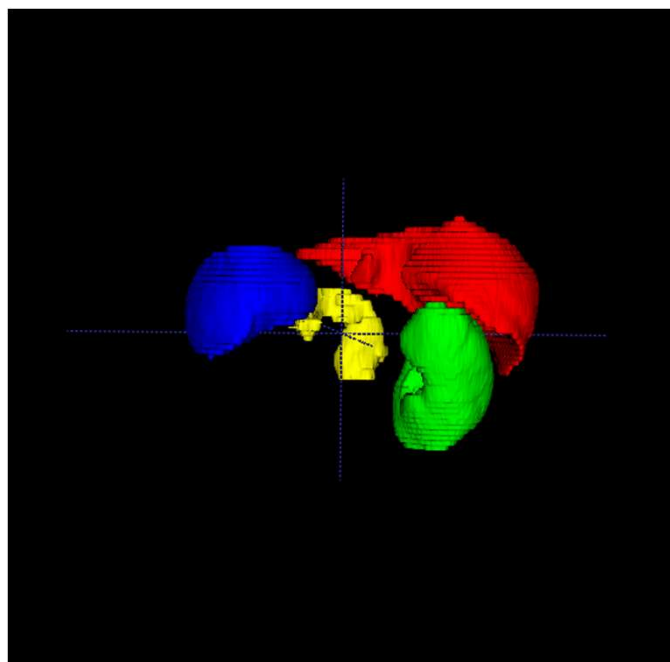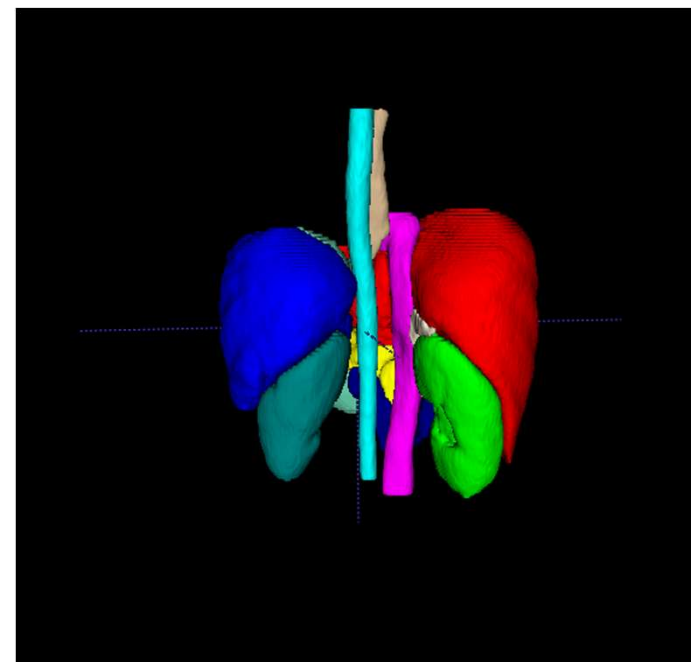

(a) single organ

(b) partial organ

(c) full organ

Supplement: supplementary_material [file attachment]
